# Supplementary material for: Single-cell multiomics profiling reveals heterogeneous transcriptional programs and microenvironment in DSRCTs
Source: PubMed Central journal article supplement — Cell Rep Med. 2024 May 22;5(6):101582. doi: 10.1016/j.xcrm.2024.101582 (PMC11228554; doi:10.1016/j.xcrm.2024.101582), 2024-05-22
Supplement: mmc1.pdf [file mmc1.pdf]

**Supplemental information**

**Single-cell multiomics profiling reveals  
heterogeneous transcriptional programs  
and microenvironment in DSRCTs**

**Clémence Henon, Julien Vibert, Thomas Eychenne, Nadège Gruel, Léo Colmet-Daage, Carine Ngo, Marlène Garrido, Nicolas Dorvault, Maria Eugenia Marques Da Costa, Virginie Marty, Nicolas Signolle, Antonin Marchais, Noé Herbel, Asuka Kawai-Kawachi, Madison Lenormand, Clémence Astier, Roman Chabanon, Benjamin Verret, Rastislav Bahleda, Axel Le Cesne, Fatima Mehta-Grigoriou, Matthieu Faron, Charles Honoré, Olivier Delattre, Joshua J. Waterfall, Sarah Watson, and Sophie Postel-Vinay**

Figure S1

A

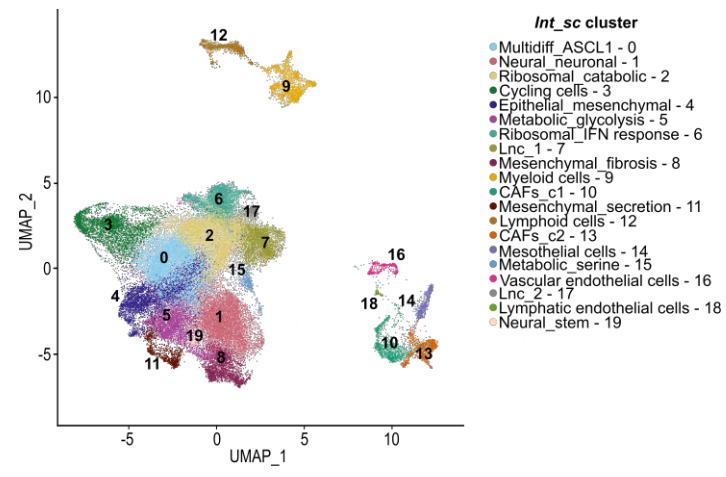

B

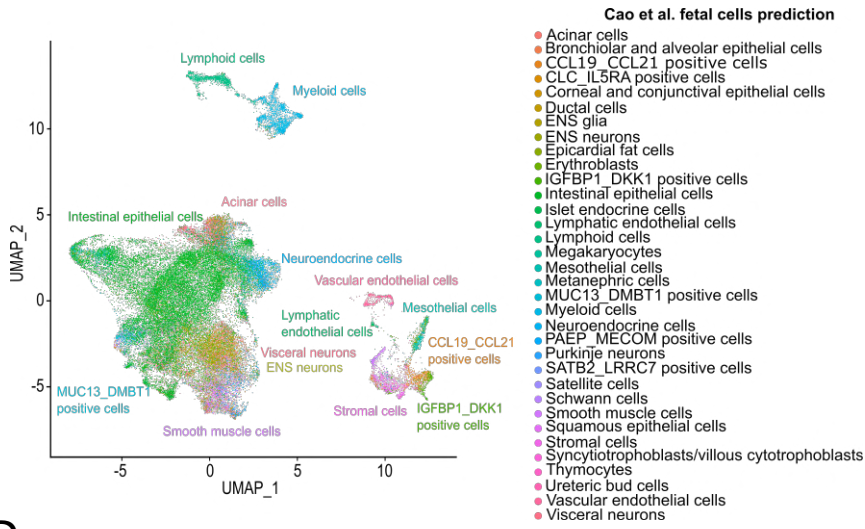

C

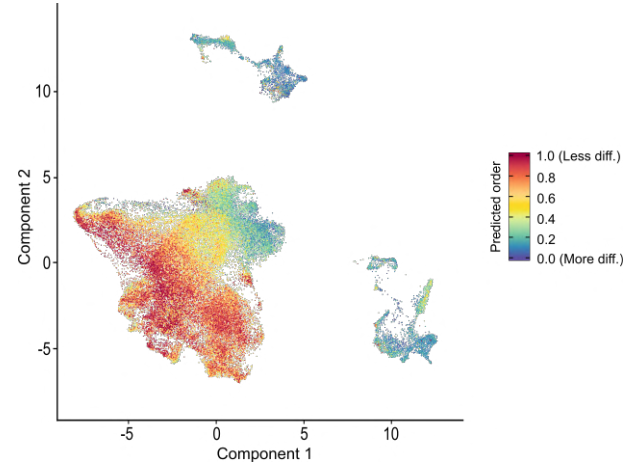

D

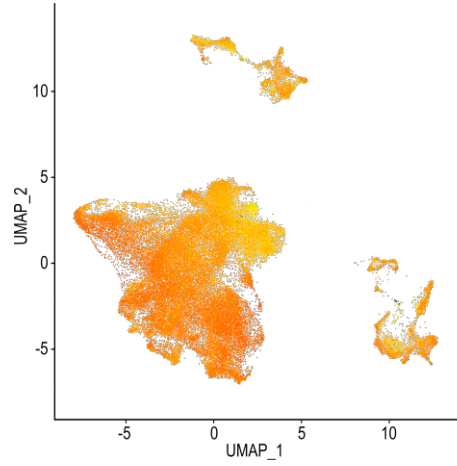

E

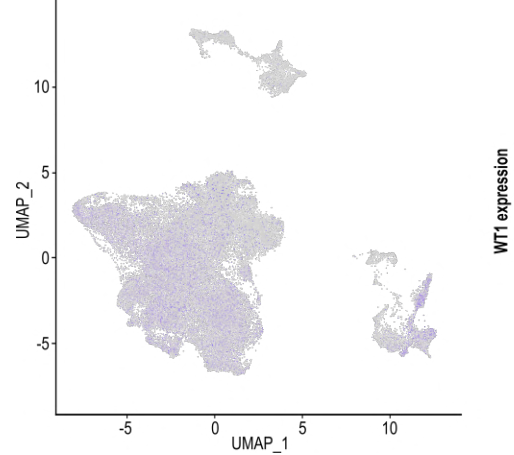

F

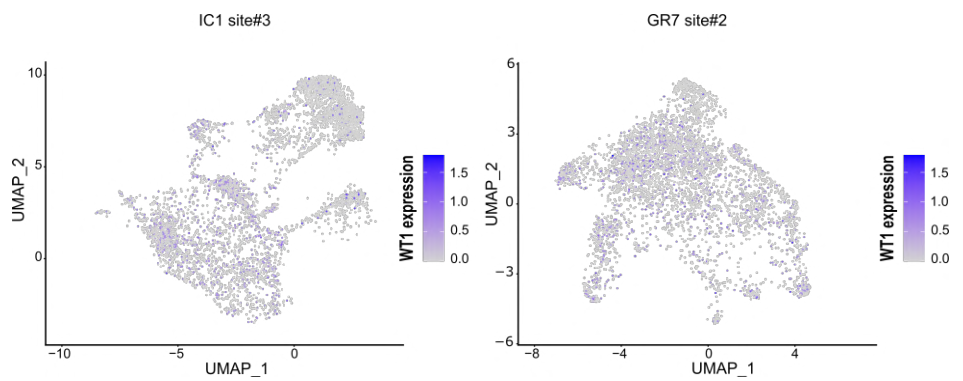

G

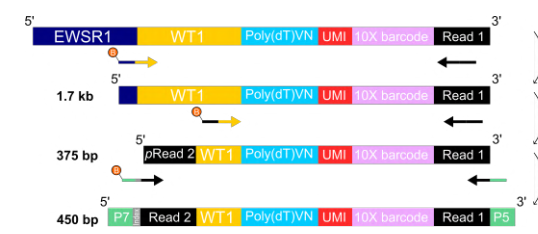

H

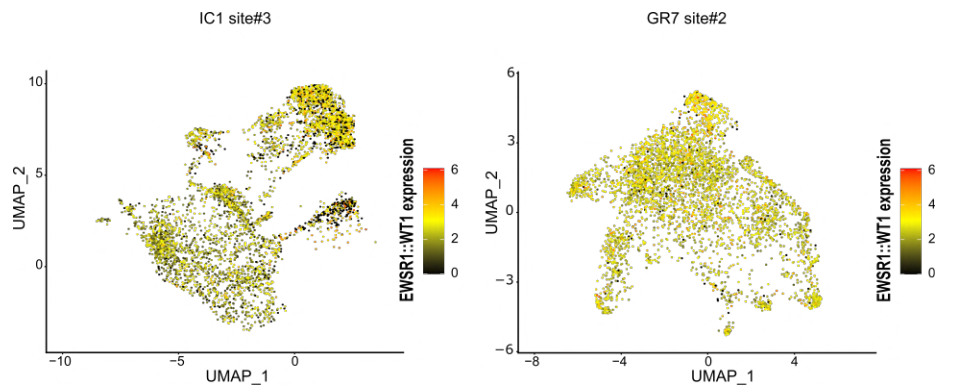

**Figure S1. DSRCT tumor cells are characterized by lineage-related states, stemness features, and homogeneous EWSR1::WT1 expression levels, related to Figures 1 and 2.**

**(A) Uniform Manifold Approximation and Projection (UMAP) highlighting *Int\_sc* 3' scRNA-seq clusters.**

**(B) UMAP showing the *Int\_sc* dataset annotation according to Cao et al. fetal cells atlas.**

**(C) UMAP highlighting differentiation degree prediction of the *Int\_sc* dataset using CytoTRACE.**

**(D) UMAP showing cell-based transcriptome entropy of the *Int\_sc* dataset using StemID.**

**(E) UMAP showing “WT1” expression within *Int\_sc* dataset. “WT1” herein corresponds to both EWSR1::WT1 and wild-type WT1 transcripts.**

**(F) UMAP showing “WT1” expression within IC1 site#3 (left panel) and GR7 site#2 (right panel) datasets.**

**(G) Schematic representation of the in-house developed method characterizing EWSR1::WT1 fusion transcript expression level at the single-cell resolution.** The method relies on sequential PCRs to enrich the library for EWSR1::WT1 specific barcoded cDNAs derived from 10X Genomics 3' single cell pipeline.

**(H) UMAP highlighting EWSR1::WT1 single-cell expression level in IC1 site#3 and GR7 site#2.**

Figure S2

A

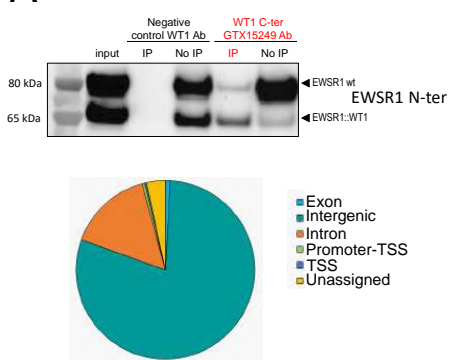

B

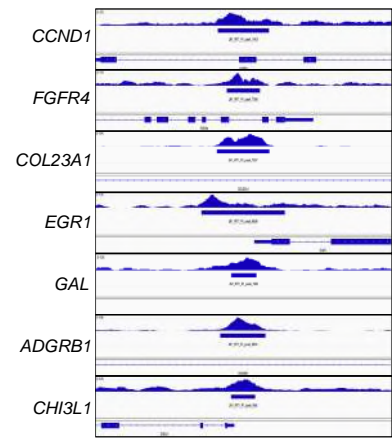

C

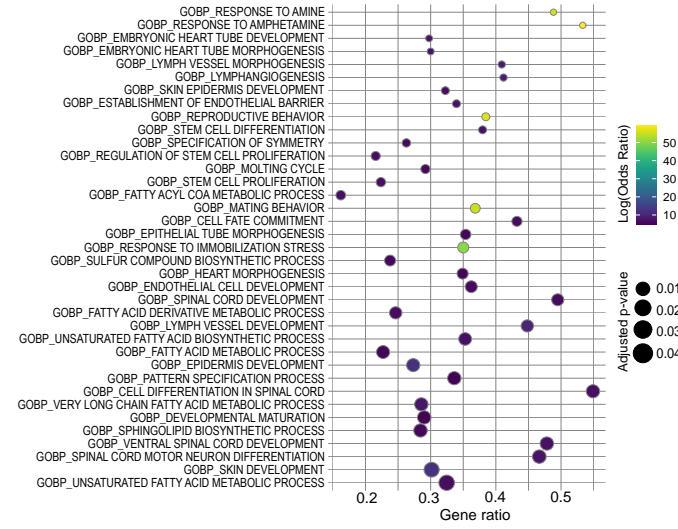

D

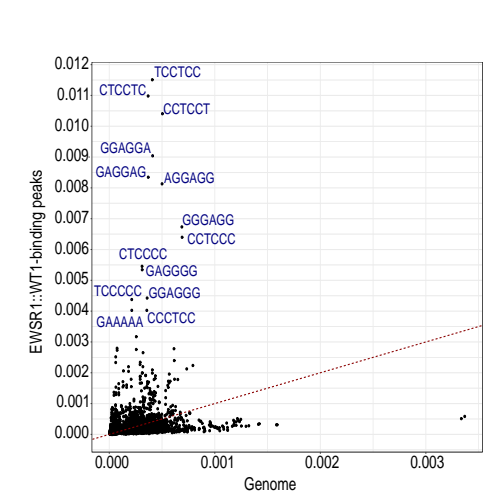

E

| Rank   | De novo motif ID   | Logo | Best match JASPAR2020 | Best match HOCOMOCO-v11 |
|--------|--------------------|------|-----------------------|-------------------------|
| Rank 1 | m1_GCGKGGGAGGVRGV  |      | EGR1 [RC]             | WT1+/-KTS               |
| Rank 2 | m5_CCCACGCA        |      | EGR2                  | EGR2                    |
| Rank 3 | m7_GGAGGAGRAGGAGAA |      | ZNF263                | ZNF263                  |
| Rank 4 | m2_GGAGGAGGAGRAAGA |      | ZNF263                | ZNF263                  |
| Rank 5 | m8_CCTCCTCCTCTCC   |      | ZNF263 [RC]           | ZNF263 [RC]             |
| Rank 6 | m3_AARTAAAYA       |      | FOXC2                 | FOXJ2                   |
| Rank 7 | m4_GAGCCACTTCC     |      | ZNF528                | XBP1 [RC]               |
| Rank 8 | m6_ACCTGKCT        |      | MYOD1                 | FIGLA [RC]              |

F

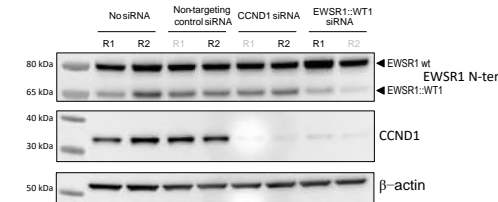

G

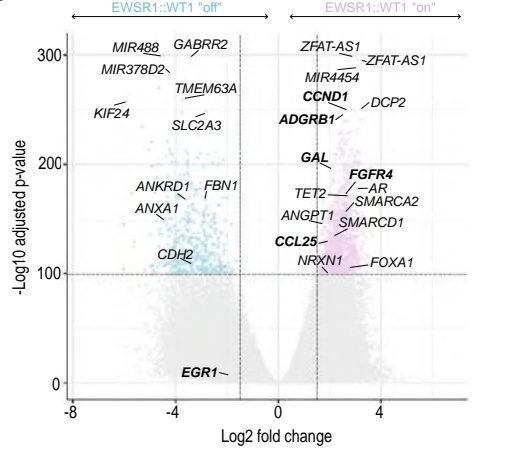

H

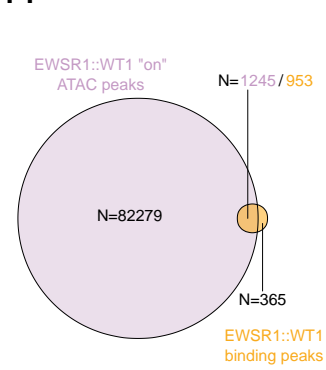

I

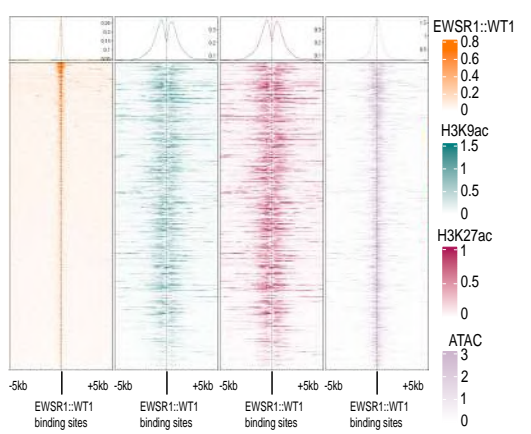

J

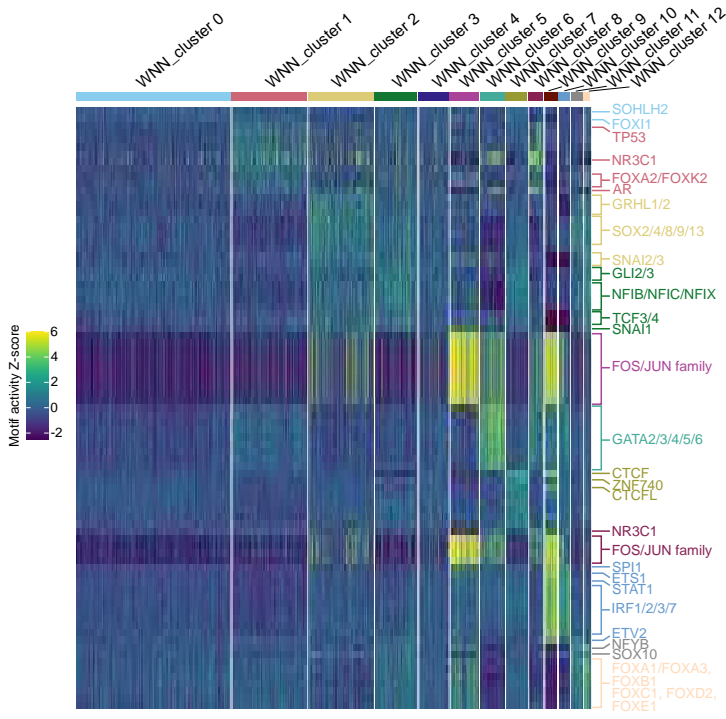

**Figure S2. EWSR1::WT1 target genes display EGR1 motif and are variably accessible across snMultiome clusters, related to Figure 3.**

**(A) EWSR1 western blot (WB) showing the input, immunoprecipitated (IP), and flow-through fractions (No IP) of EWSR1::WT1 in JN-DSRCT-1 protein lysate (upper panel).** IP was done using WT1 C-ter GTX15249 antibody. As a negative control, we show an inefficient immunoprecipitation with an alternate WT1 antibody. Strong staining for EWSR1 at the predicted fusion protein size (65 kDa) highlights the specificity of the immunoprecipitated fraction. WB was performed using the EWSR1 C-9 clone, sc-48404.

**Pie chart representing the genomic distribution of EWSR1::WT1-binding peaks (lower panel).** TTS relates to transcription termination site.

**(B) Integrated Genome Viewer (IGV) track of EWSR1::WT1 known (*CCND1*, *FGFR4*, *COL23A1*, *EGR1*) and newly described (*GAL*, *ADGRB1*, *CHI3L1*) targets.**

**(C) Gene Ontology (GO) enrichment analysis of EWSR1::WT1-binding peaks for GO biological process (GOBP).** All pathways with significant enrichment (adjusted p-value <0.05) are displayed on y-axis from lower (top) to higher (bottom) adjusted p-value. Gene ratio is shown on x-axis. Dots color refer to Log(Odds Ratio).

**(D) Scatter plot representing 6-mers frequency within EWSR1::WT1-binding peaks (y-axis) according to their frequency within the whole genome (x-axis).** Specific enrichment for GGA/CCT repeats motifs is highlighted.

**(E) Chart recapitulating significantly enriched de novo EWSR1::WT1-binding motifs with their best match with known transcription factor (TF) consensus motifs.** The analysis was performed using the MEME suite with JASPAR2020 or HOCOMOCO-v11 TF database.

**(F) WB of EWSR1::WT1 expression assessment upon EWSR1::WT1 silencing of JN-DSRCT-1 cells before assay for transposase-accessible chromatin with sequencing (ATAC-seq).** Silencing was performed using a EWSR1::WT1- or *CCND1*-targeting siRNA, or a control non-targeting siRNA at H48 post-transfection. A mock-transfected control is shown. EWSR1::WT1 and wild type EWSR1 correspond to the 65 kDa and 80 kDa band respectively, using a EWSR1 N-ter antibody (EWSR1 C-9 clone, sc-48404). *CCND1*, which is a direct target of EWSR1::WT1, is shown as a positive control for efficient EWSR1::WT1 silencing. b-actin is shown as a control for protein loading at 50 kDa.

**(G) Volcano plot showing ATAC-seq differentially accessible peaks-corresponding genes in EWSR1::WT1-silenced versus non-silenced JN-DSRCT-1 cells.** Peaks with increased accessibility upon EWSR1::WT1 silencing are shown on the left (EWSR1::WT1 “off”), whereas those that have increased accessibility in non-silenced cells are shown on the right (EWSR1::WT1 “on”). Colored dots correspond to the most differentially accessible peaks ( $-\text{Log}_{10}(\text{adjusted p-value}) > 100$  and absolute  $\text{Log}_2$  fold change ( $\text{Log}_2\text{FC}) > 1.5$ ).

**(H) Venn diagram showing overlap between EWSR1::WT1 “on” ATAC peaks and EWSR1::WT1-binding peaks.**

**(I) ChIP-seq read coverage heatmaps centered around EWSR1::WT1-binding peaks (+/- 5 kb) and ordered by genomic regions.** Heatmaps display EWSR1::WT1 (first panel), H3K9ac (second panel), and H3K27ac (third panel) ChIP-seq assays. The fourth panel shows coverage for EWSR1::WT1 “on” peaks from ATAC-seq assay.

**(J) Heatmap showing cell-based motif activity Z-score for the top enriched motifs from known TFs in the snMultiome assay.**

# Figure S3

## A

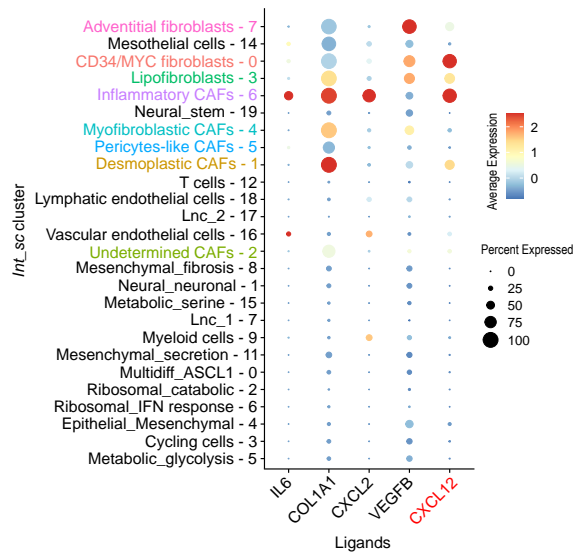

## B

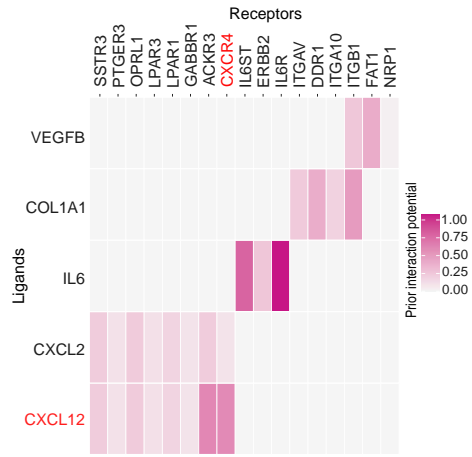

## C

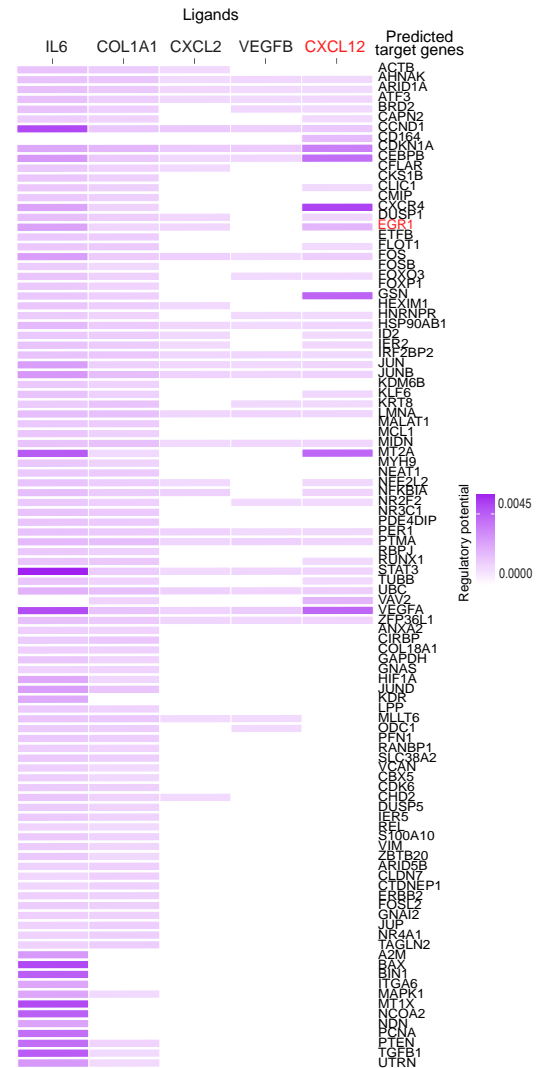

## D

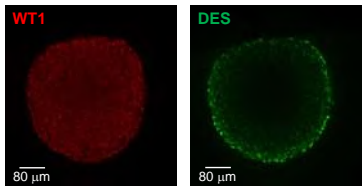

## E

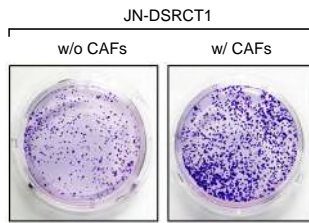

## F

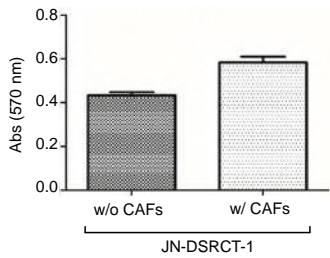

## G

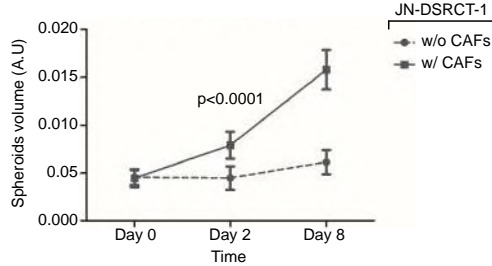

**Figure S3. Microenvironment shapes DSRCT cells phenotype, related to Figure 5.**

- (A) Selected ligands expression across Int\_sc dataset clusters (NicheNet).** The color scale represents the average expression Z-score percluster. For each cluster, the percentage of cells expressing the feature of interest is represented by the dot size.
- (B) Prior ligand-receptor interaction potential between selected ligands and matching receptors in the Int\_sc dataset (NicheNet).**
- (C) Regulatory potential between selected ligands and imputed downstream target genes from high (purple) to low (white) regulatory activity.**
- (D) Representative image of a JN-DSRCT-1 spheroid embedded in Matrigel stained for DES and WT1.**
- (E) Colony formation assay (CFA) of JN-DSRCT-1 cell line cocultured with (w/) or without (w/o) CAFs obtained from DSRCT patients-derived xenografts (PDXs).** The picture shows colonies stained with crystal violet after two weeks of coculture.
- (F) Barplots showing the percentage of well area covered by JN-DSRCT-1 colonies cultures with (w/) or without (w/o) PDXs-derived CAFs, assessed by absorbance cell viability assay.** A t-test was used for p-value calculation.
- (G) JN-DSRCT-1 spheroids growth culture in the presence (w/) or absence (w/o) of DSRCT PDXs-derived CAFs.** The median volume of the spheroids (triplicate assay) assessed at Day 0, Day 2, and Day 8 is shown on y-axis. A.U: Arbitrary Unit; two-way ANOVA was used for p-value calculation.
